# Supplementary material
Source: PubMed Central journal article supplement (PMC2763842)
Supplement: supp_91393.2008_suppfigs.pdf [file supp_91393.2008_suppfigs.pdf]

## **Supplemental Figure**

**Fig S1.** Basal NO production was measured in YC and OC carotid arteries using a DAF-FM DA bioassay. Rate of DAF fluorescence was measured from the endothelium over 10 minutes, images recorded every 30 seconds. DAF fluorescence image of YC at first 30 seconds (A) and image of YC at 10 minutes (B); DAF fluorescence image of OC at 30 seconds (C), DAF image of OC at 10 minutes (D)

**Fig S2.** Native 4°C polyacrylamide gel electrophoresis and Western blot for eNOS to determine eNOS dimerization in YC, OC and OABH rats. The samples were run on the same gel.
