# Supplementary material
Source: PubMed Central journal article supplement (PMC2763842)

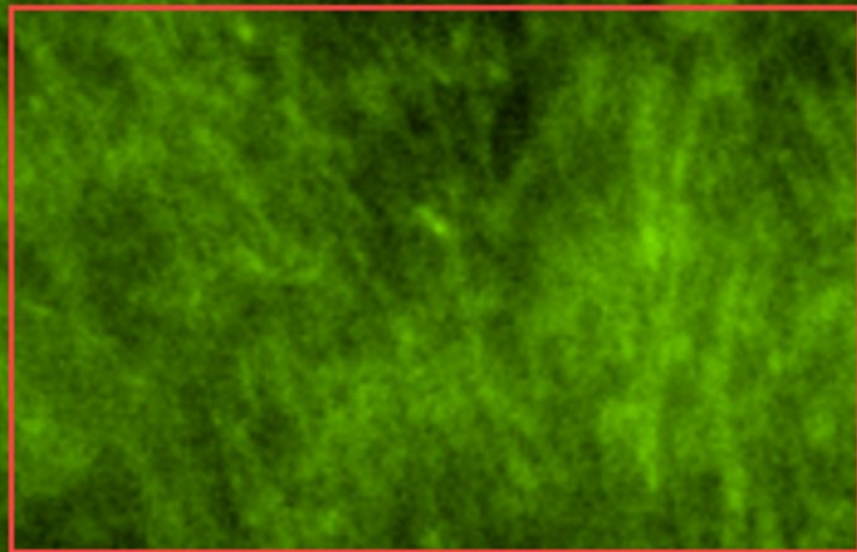

1.

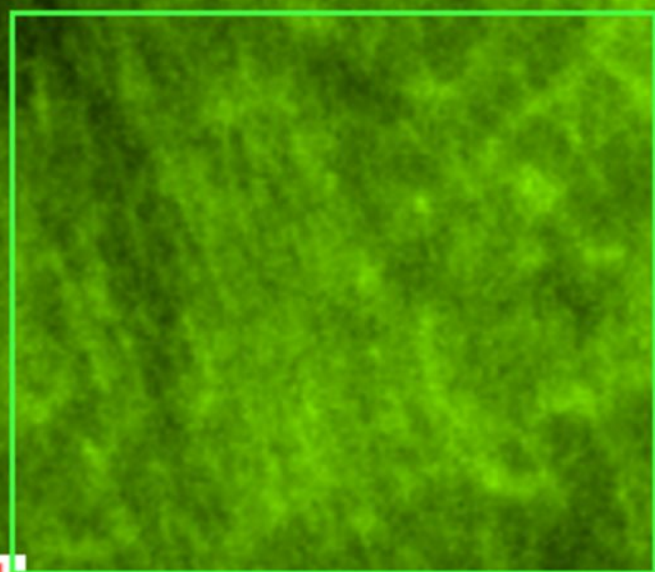

2.

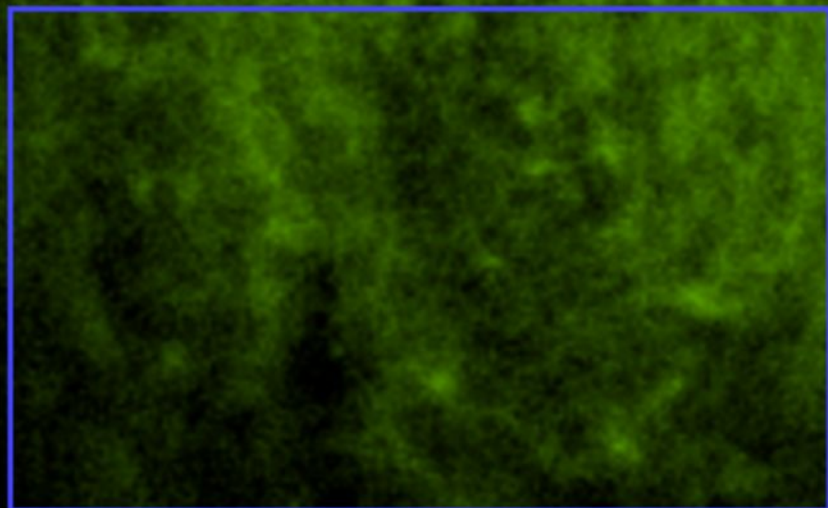

3.

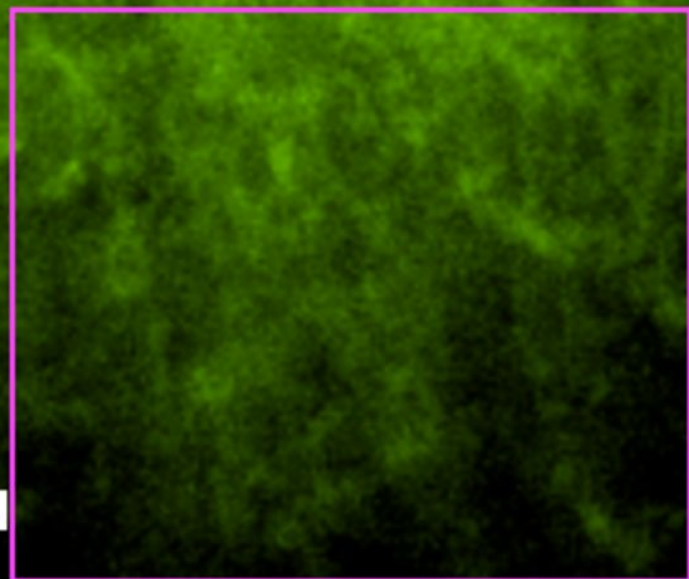

4.

Supplement: supp_91393.2008_figS1a.pdf [file supp_91393.2008_figS1a.pdf]

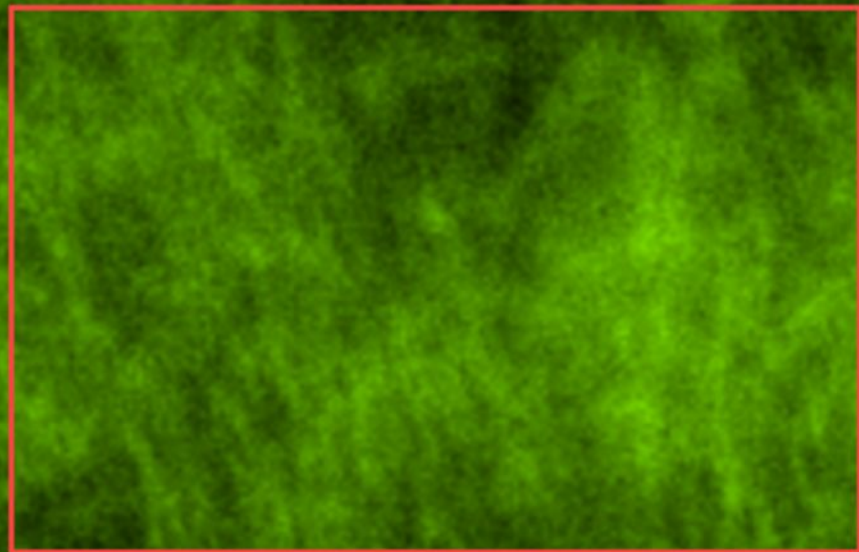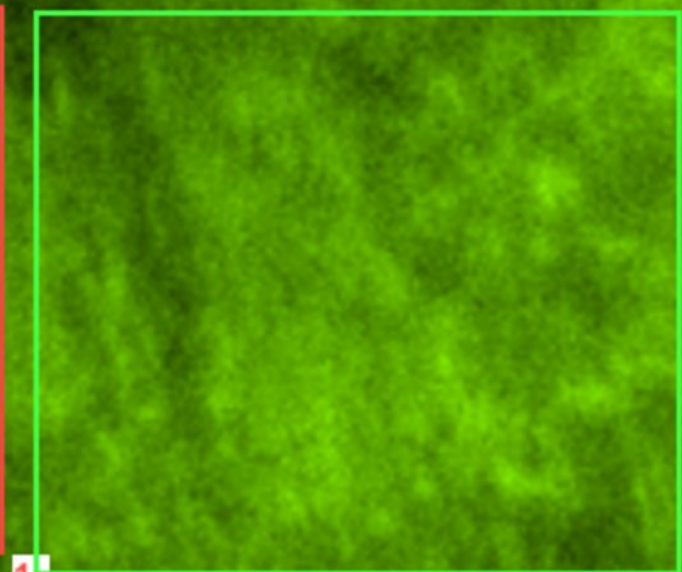

1.

2.

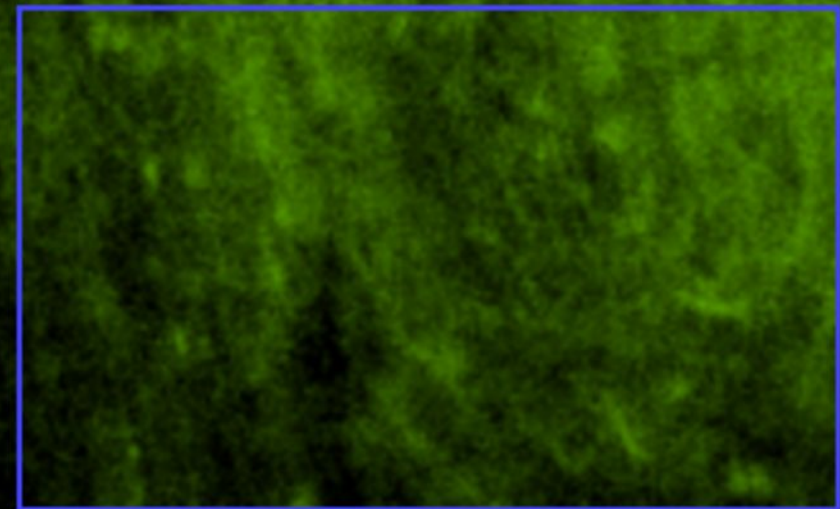

3.

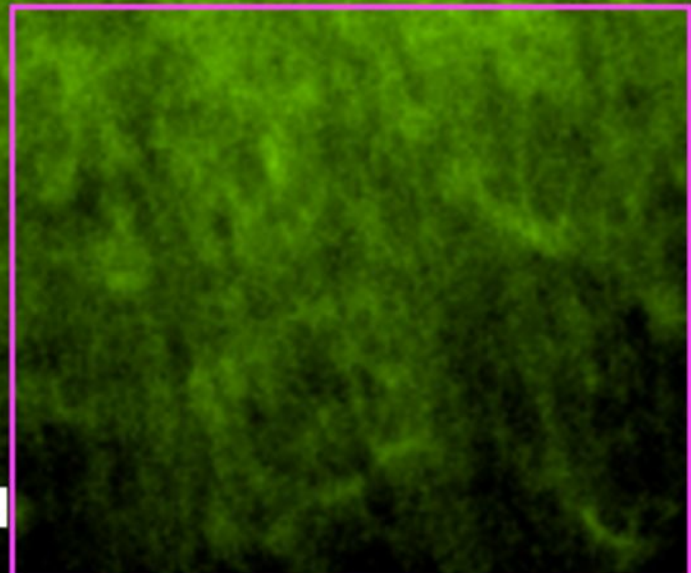

4.

Supplement: supp_91393.2008_figS1b.pdf [file supp_91393.2008_figS1b.pdf]

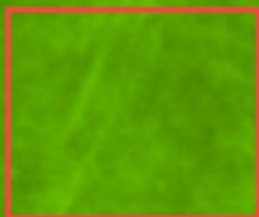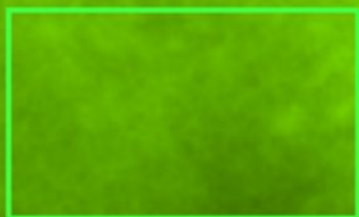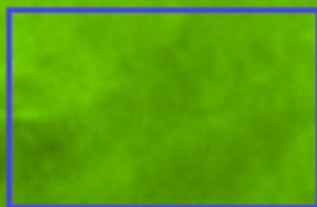

1.

2.

3.

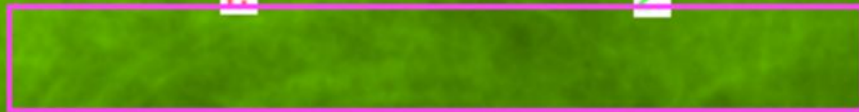

4.

Supplement: supp_91393.2008_figS1c.pdf [file supp_91393.2008_figS1c.pdf]

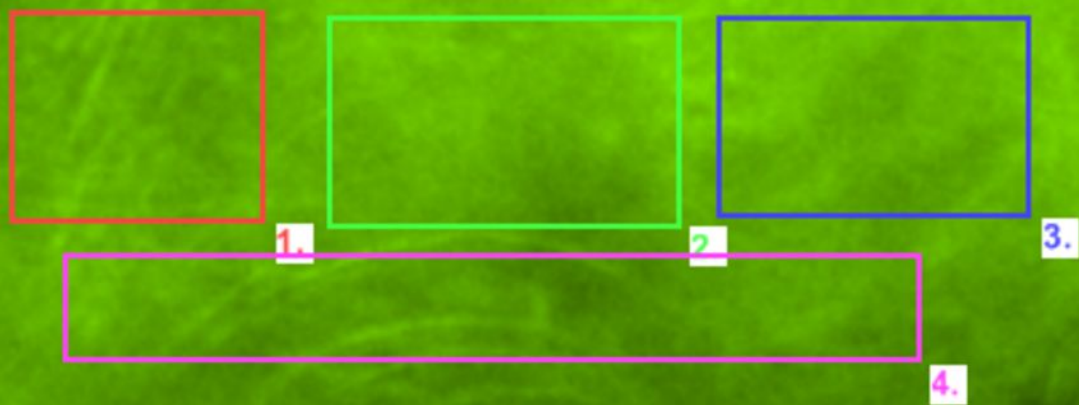

Supplement: supp_91393.2008_figS1d.pdf [file supp_91393.2008_figS1d.pdf]

S2

Y      Y      O      O      ABH   ABH   ABH   ABH   ABH   O      O      O

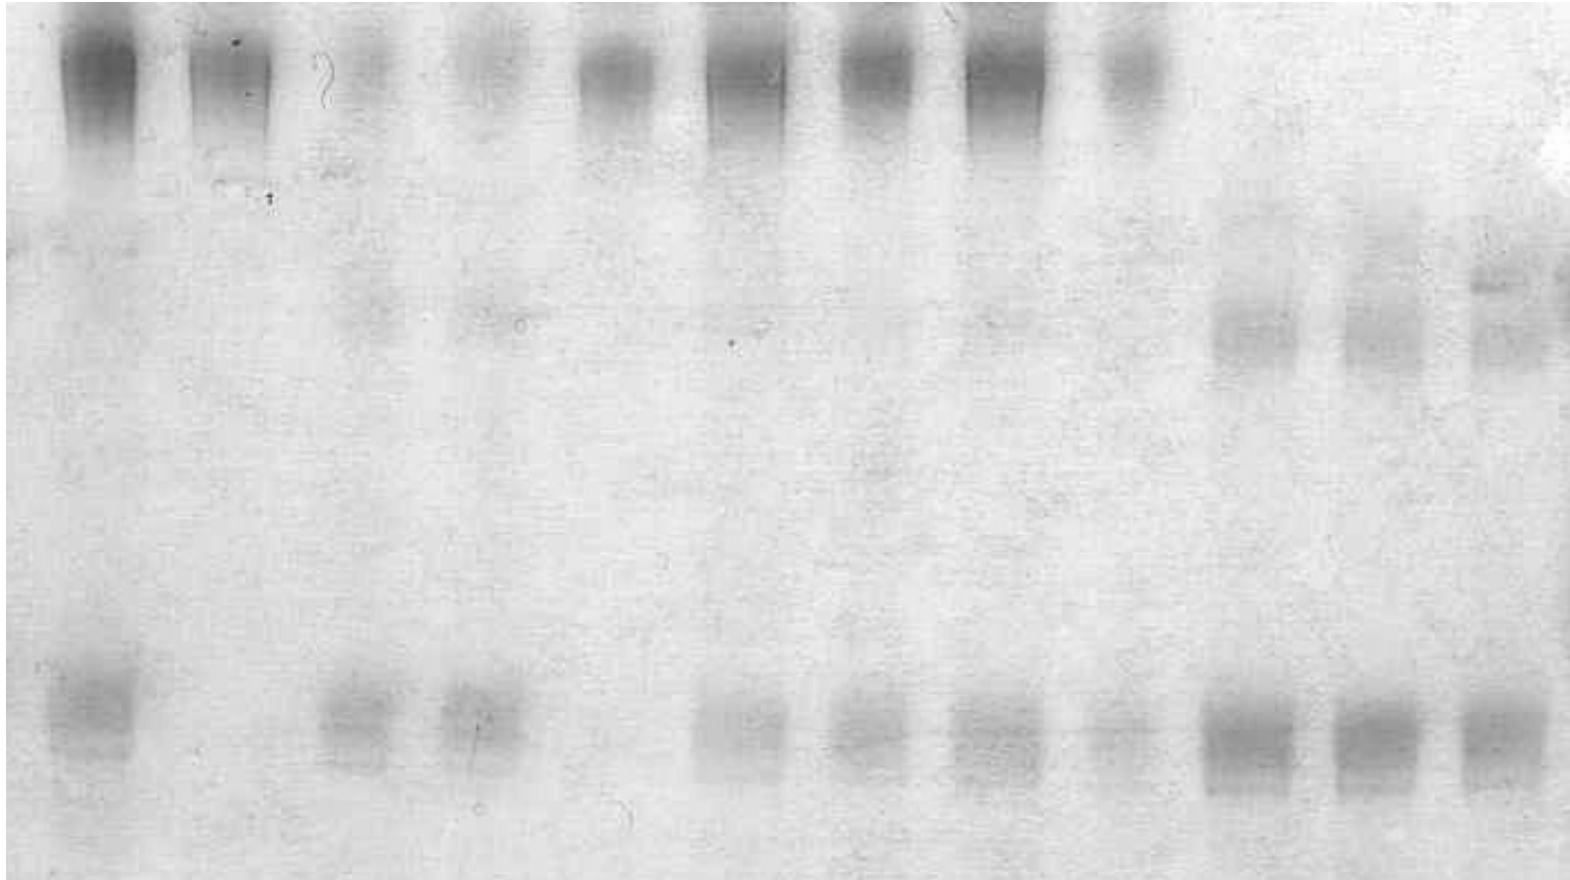

Supplement: supp_91393.2008_figS2.pdf [file supp_91393.2008_figS2.pdf]
